# Supplementary material for: Vertical foraging shifts in Hawaiian forest birds in response to invasive rat removal
Source: PLOS journal article supplement (doi:10.1371/journal.pone.0202869), 2018-09-24

## Supplemental Materials:

Vertical foraging shifts in Hawaiian forest birds in response to invasive rat removal

Erin E. Wilson Rankin<sup>1,#a\*¶</sup>, Jessie L. Knowlton<sup>2,#b¶</sup>, Daniel S. Gruner<sup>1</sup>, David J.

Flaspohler<sup>2</sup>, Christian P. Giardina<sup>3</sup>, Devin R. Leopold<sup>4</sup>, Anna Buckardt<sup>2</sup>, William C. Pitt<sup>5</sup>,

Tadashi Fukami<sup>4</sup>

<sup>1</sup> Department of Entomology, University of Maryland, College Park, Maryland, United States of America

<sup>2</sup> School of Forest Resources and Environmental Science, Michigan Technological University, Houghton, Michigan, United States of America

<sup>3</sup> Institute of Pacific Islands Forestry, United States Department of Agriculture, United States Forest Service, Hilo, Hawai'i, United States of America

<sup>4</sup> Department of Biology, Stanford University, Stanford, California, United States of America

<sup>5</sup> Smithsonian Conservation Biology Institute, Smithsonian Institution, Front Royal, Virginia, United States of America

<sup>#a</sup> Current address: Department of Entomology, University of California Riverside, Riverside, California, United States of America

<sup>#b</sup> Current address: Department of Biology, Wheaton College, Boston, Massachusetts, United States of America

**S2 Figure. Mean foraging height of birds by rat treatment and horizontal foraging position** Foraging height was unaffected by horizontal foraging position of the bird within the canopy. Different letters indicate significance at  $p < 0.01$  in post-hoc tests.

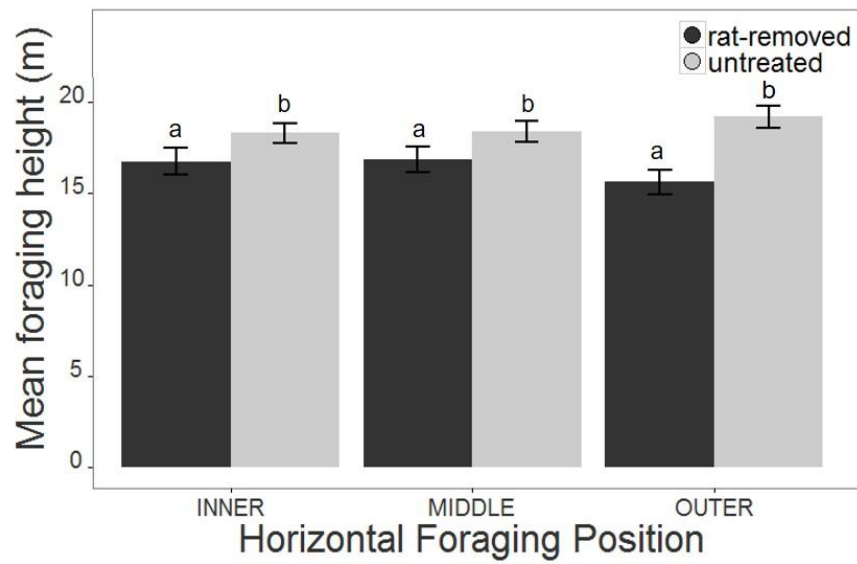

Supplement: S2 (10.1371/journal.pone.0202869.s002) [file journal.pone.0202869.s002]
